# Supplementary material for: Development and validation of a novel biomarker panel for Crohn’s disease and rheumatoid arthritis diagnosis and treatment
Source: publisher site journal article supplement (doi:10.18632/aging.205644), 2024-03-10
Supplement: Supplementary file [file aging-v16i6-205644-supplementary-material-SD1.pdf]

**SUPPLEMENTARY FIGURES**

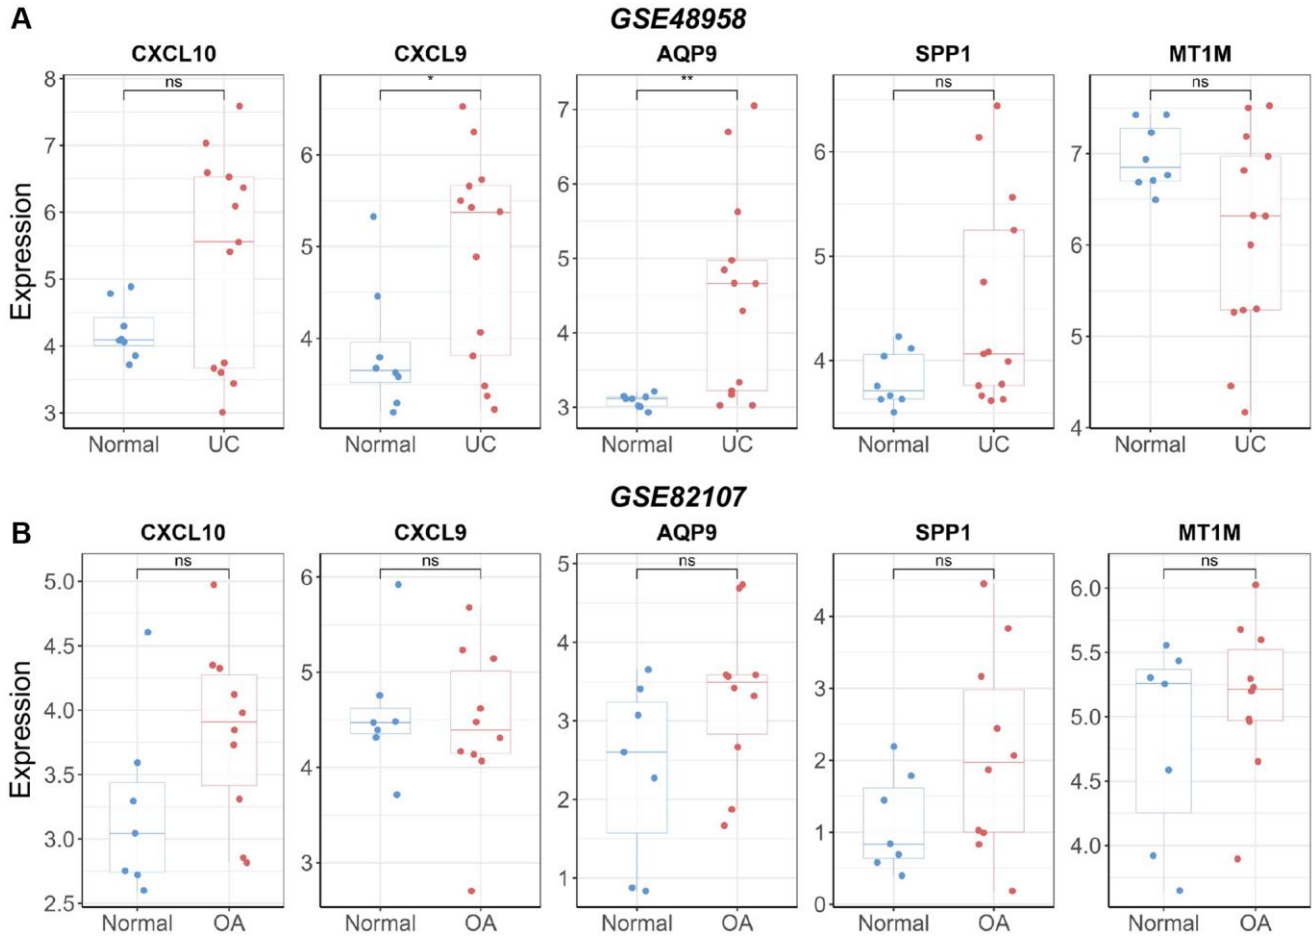

**Supplementary Figure 1. Validate the expression of the core genes in the UC and OA cohorts. (A)** Differential expression analysis of 5 core genes in the UC cohort. **(B)** Differential expression analysis of 5 core genes in the OA cohort. Abbreviations: UC: ulcerative colitis; OA: osteoarthritis; ns: no significance. \* $P < 0.05$  \*\* $P < 0.01$ .

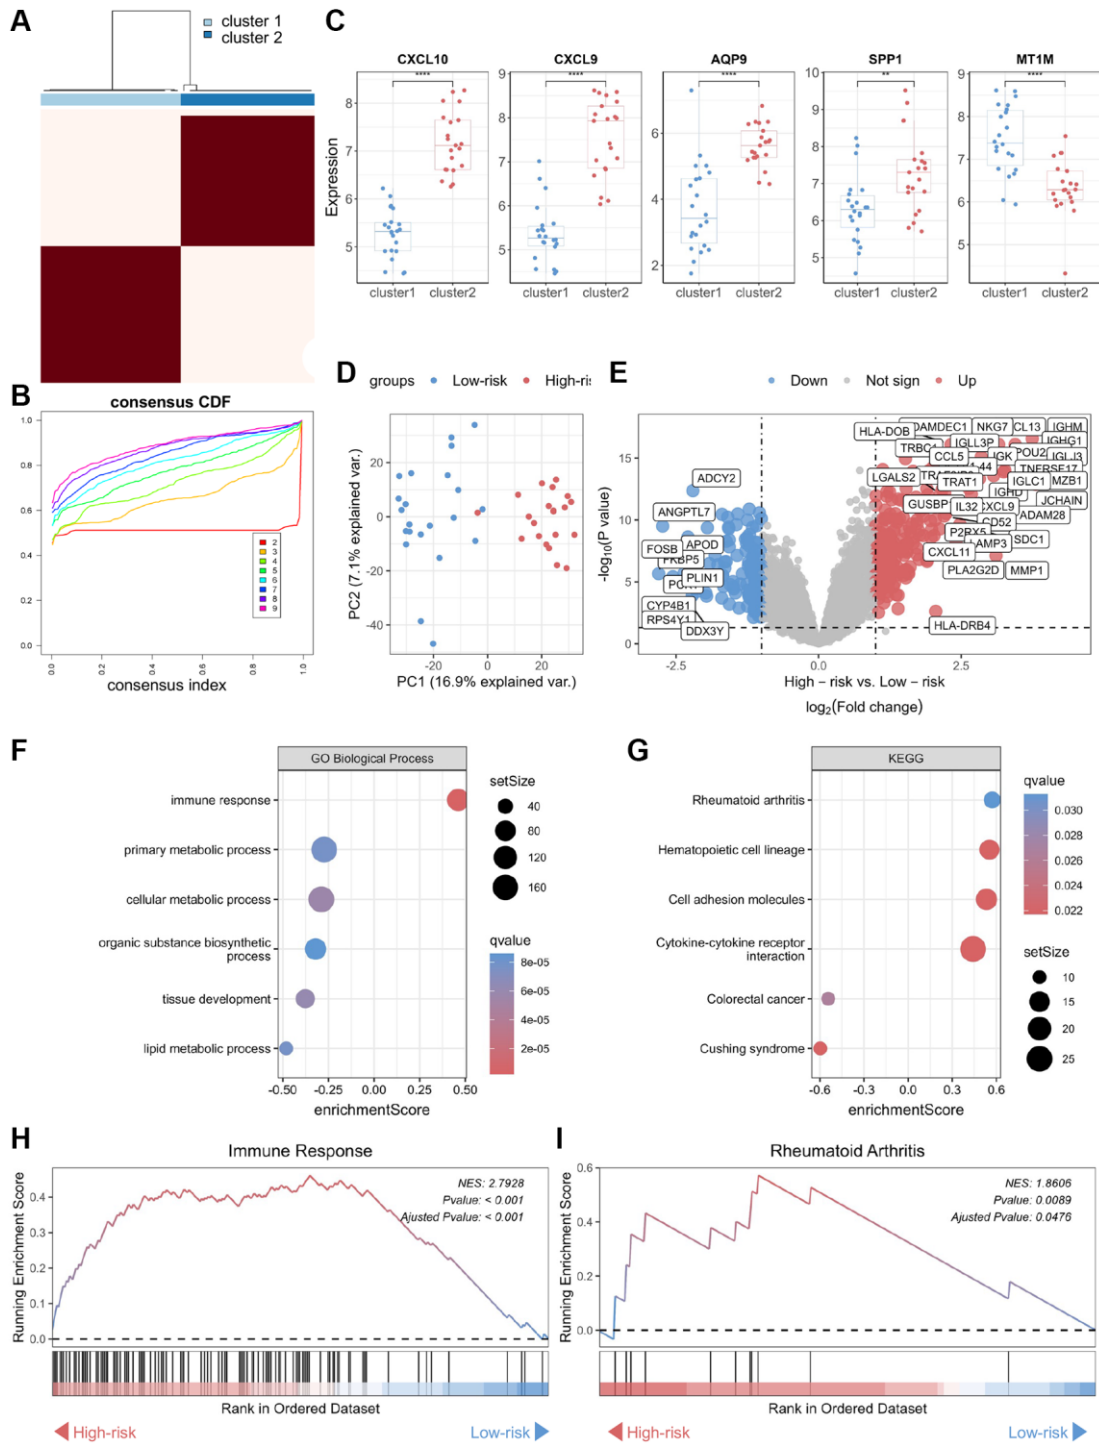

**Supplementary Figure 2. Functional annotation of core genes in the biomarker panel based on consensus clustering in RA.** (A) Consensus score matrix of all samples when the number of clusters  $k = 2$ . (B) CDF curves of the consistency matrix for each  $k$ -value. (C) Differential analysis of the five core genes in the two subtypes (cluster 1 and cluster 2) obtained by consensus clustering. (D) Unsupervised PCA plots of samples in two new groups (high-risk and low-risk). (E) Volcanoes of differentially expressed genes in high-risk and low-risk group. (F) Gene ontology biological process and (G) KEGG enrichment analysis of DEGs between high-risk and low-risk. GSEA analysis of (H) Immune Response, and (I) Rheumatoid Arthritis signaling pathways. Abbreviations: CDF: cumulative distribution function; PCA: Principal Component Analysis; KEGG: Kyoto Encyclopedia of Genes and Genomes; DEG: Differentially Expressed Gene; GSEA: Gene Set Enrichment Analysis; TNF: tumor necrosis factor. \*\* $P < 0.01$ , \*\*\*\* $P < 0.0001$ .

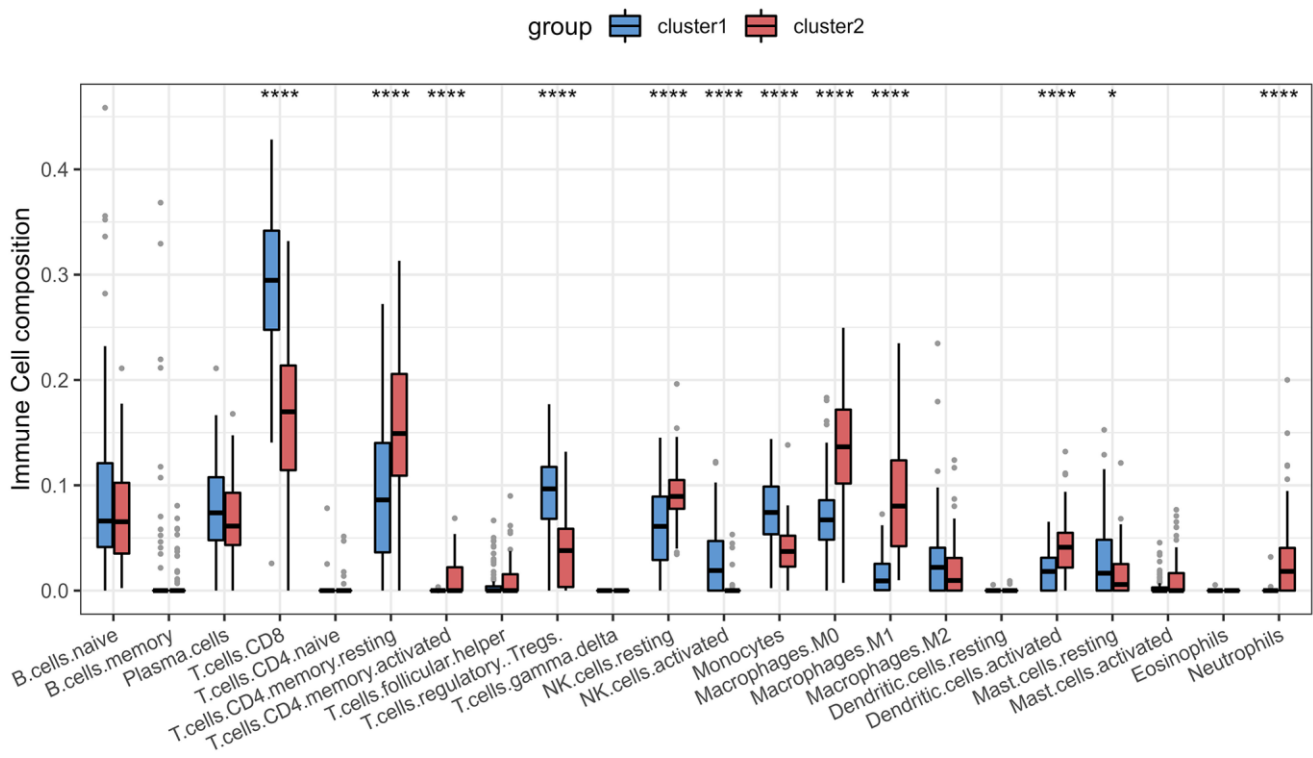

**Supplementary Figure 3. Differential analysis of immune cell type scores based on CIBERSORT. \* $P < 0.05$ ; \*\*\*\* $P < 0.0001$ .**

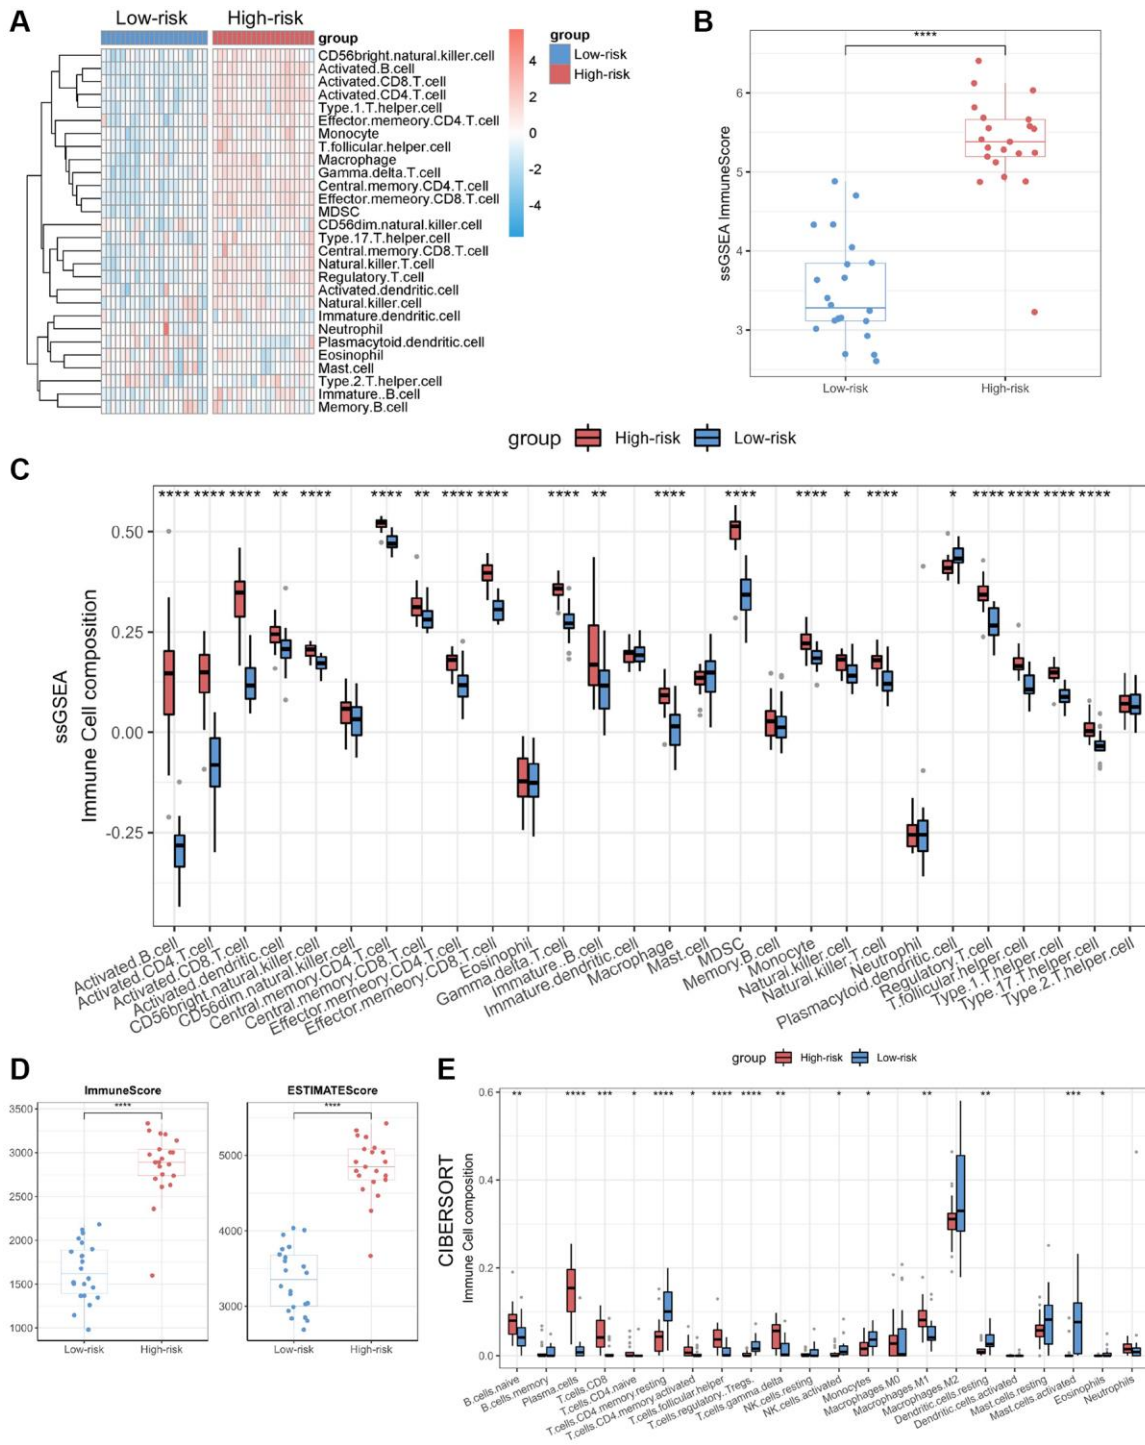

**Supplementary Figure 4. Immuno-infiltration analysis of core genes in RA. (A)** Heat map of immune cell type scores based on ssGSEA. **(B)** Differential analysis of the sum of immune scores based on ssGSEA. **(C)** Differential analysis of immune cell type scores based on ssGSEA. **(D)** Differential analysis of ESTIMATE-based immune scores and ESTIMATE score. **(E)** Differential analysis of immune cell type scores based on CIBERSORT. Abbreviation: ssGSEA: single sample Gene Set Enrichment Analysis. \* $P < 0.05$ ; \*\* $P < 0.01$ ; \*\*\* $P < 0.001$ ; \*\*\*\* $P < 0.0001$ .

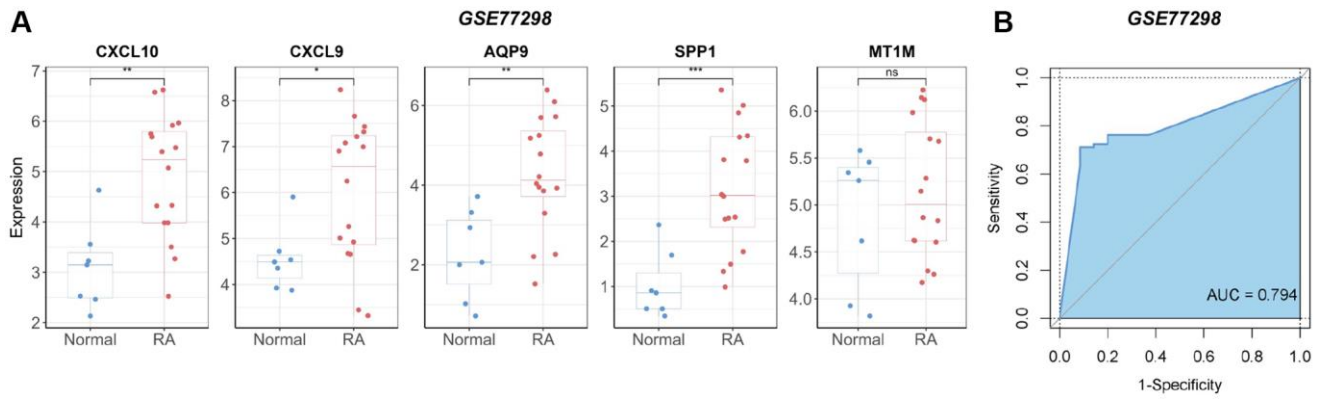

**Supplementary Figure 5. Verification of the diagnostic value of the biomarker panel in RA validation cohorts. (A)** Expression analysis and **(B)** ROC curve analysis of core genes in GSE77298. Abbreviations: ROC: Receiver Operating Characteristic; AUC: Area Under Curve; ns: no significance. \* $P < 0.05$ ; \*\* $P < 0.01$ ; \*\*\* $P < 0.001$ .

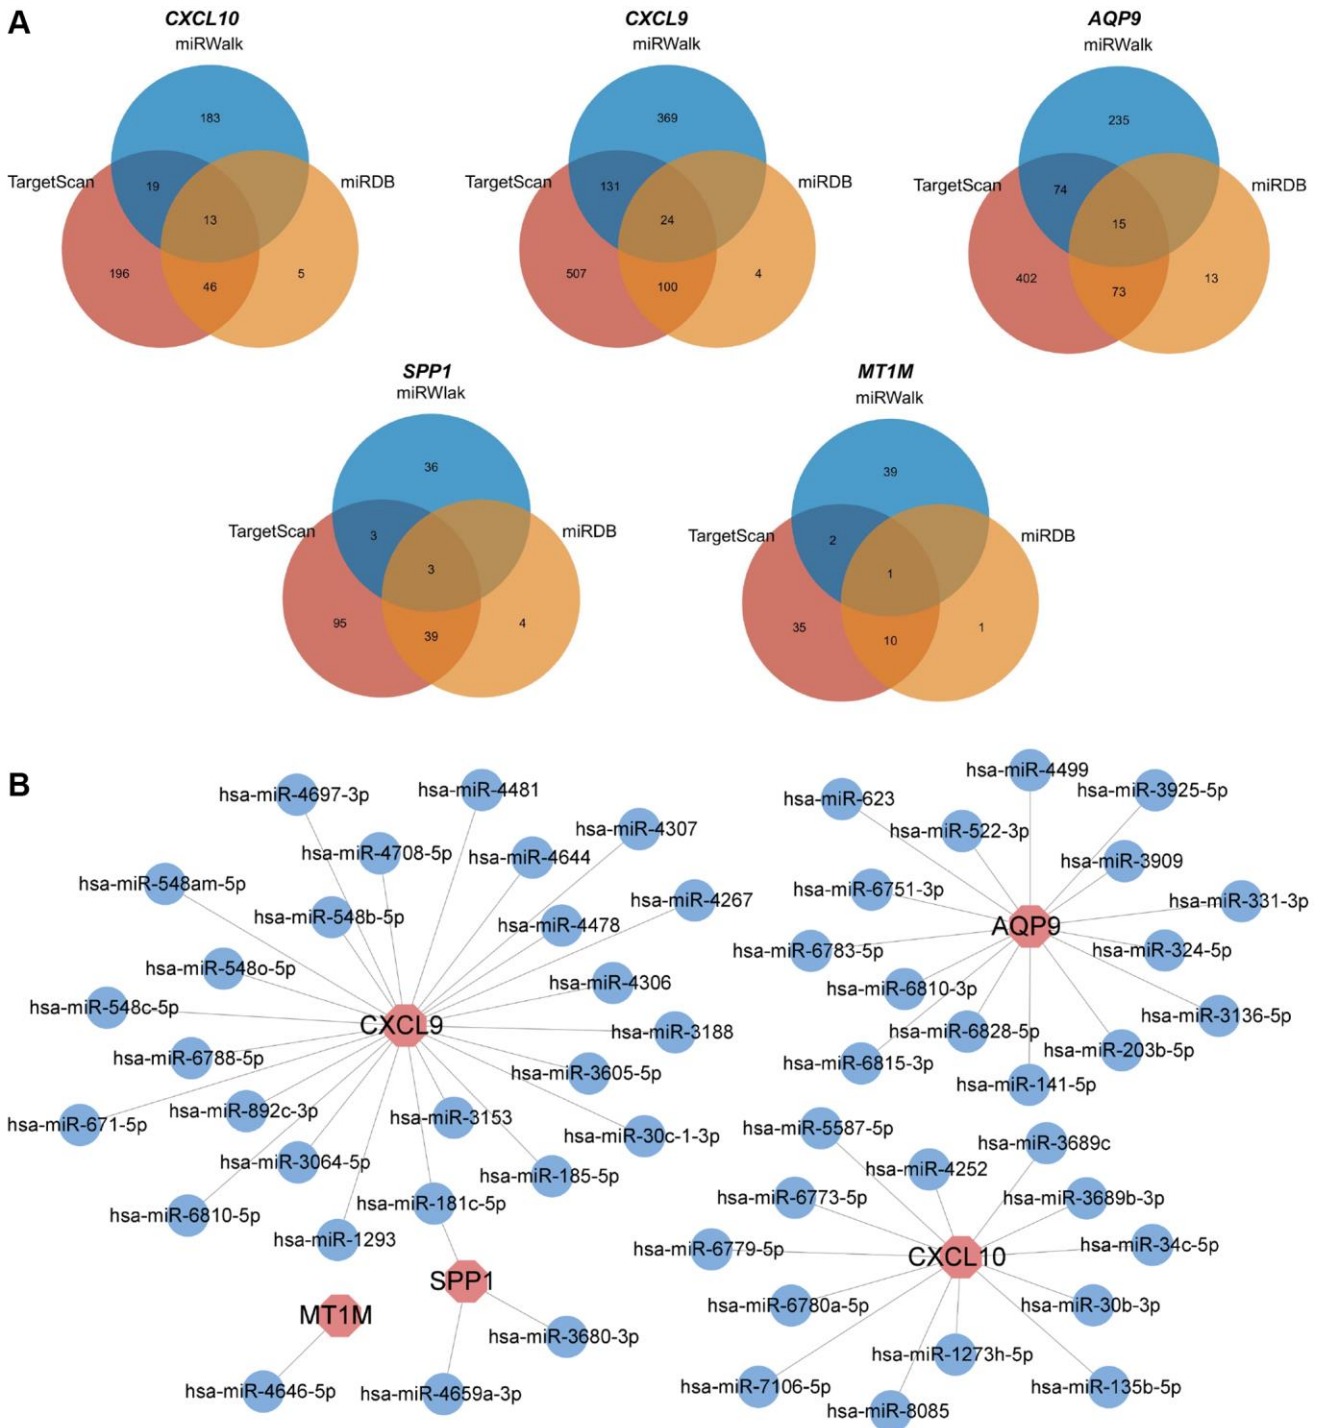

**Supplementary Figure 6. Construction of miRNA-mRNA co-expression network. (A)** Acquisition of core gene co-expression miRNA Venn diagrams based on TargetScan, miRWalk, and miRDB. **(B)** Visualization of co-expression networks of miRNAs and core genes.

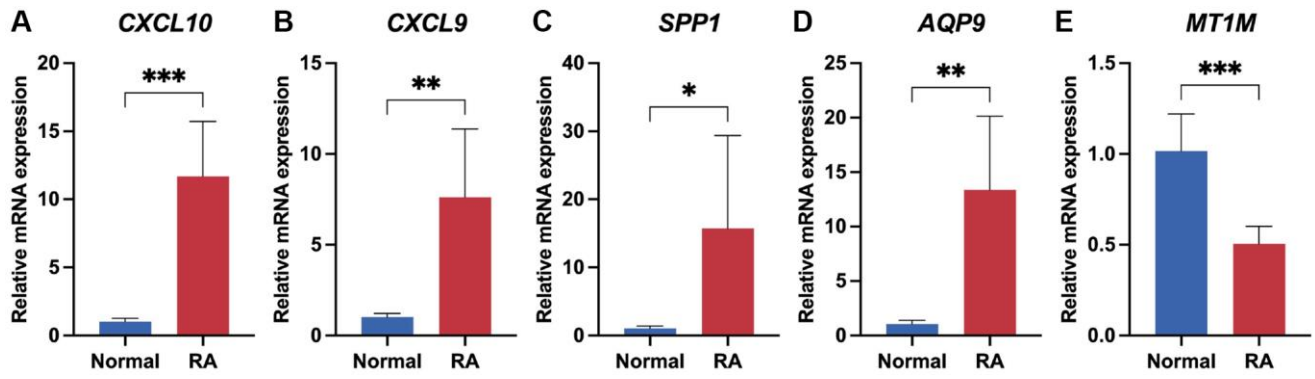

**Supplementary Figure 7. Validation of biomarker panel expression by q-PCR in serum samples from patients with RA and healthy controls.** Differential comparison of mRNA expression levels of CXCL10 (A), CXCL9 (B), SPP1 (C), AQP9 (D), MT1M (E) in serum samples from patients with RA and healthy controls. \* $P < 0.05$ ; \*\* $P < 0.01$ ; \*\*\* $P < 0.001$ .
